# Supplementary material
Source: publisher figshare collection journal article supplement (https://frontiersin.figshare.com/ndownloader/files/27375269)
Supplement: Supplementary file [file 27375269]

## *Supplementary Material*

### 1 Supplementary Figures and Tables

#### 1.1 Supplementary Tables

**Supplementary Table 1.** Duration of each experiment in days.

| Experiment                                     | Community A | Community B | Community C |
|------------------------------------------------|-------------|-------------|-------------|
| Acidic pH values                               | 51          | -           | 21          |
| Acetate concentration                          | 63          | 92          | 63          |
| Acidic/neutral pH or methanogenesis inhibition | 77          | 48          | 77          |
| Lactate and ethanol addition                   | 26          | 40          | 26          |

**Supplementary Table 2.** Components and converting factors for electron balances.

| Compound (formula)                                                                             | Molar mass (g mol <sup>-1</sup> ) | mol e <sup>-</sup> /mol |
|------------------------------------------------------------------------------------------------|-----------------------------------|-------------------------|
| Biomass and yeast extract (C <sub>1</sub> H <sub>1.8</sub> O <sub>0.5</sub> N <sub>0.2</sub> ) | 24.6                              | 4.2                     |
| Acetic acid/acetate (C <sub>2</sub> H <sub>4</sub> O <sub>2</sub> )                            | 60.0                              | 8.0                     |
| Ethanol (C <sub>2</sub> H <sub>6</sub> O)                                                      | 46.0                              | 12.0                    |
| Lactic acid/lactate (C <sub>3</sub> H <sub>6</sub> O <sub>3</sub> )                            | 90.0                              | 12.0                    |
| Butyric acid/butyrate (C <sub>4</sub> H <sub>8</sub> O <sub>2</sub> )                          | 88.0                              | 20.0                    |
| Caproic acid/caproate (C <sub>6</sub> H <sub>12</sub> O <sub>2</sub> )                         | 116.1                             | 32.0                    |
| Propionic acid/propionate (C <sub>3</sub> H <sub>6</sub> O <sub>2</sub> )                      | 74.0                              | 14.0                    |
| Valeric acid/valerate (C <sub>5</sub> H <sub>10</sub> O <sub>2</sub> )                         | 102.1                             | 26.0                    |
| i-Butyric acid/i-butyrate (C <sub>4</sub> H <sub>8</sub> O <sub>2</sub> )                      | 88.0                              | 20.0                    |
| H <sub>2</sub>                                                                                 | 2.0                               | 2.0                     |
| CO <sub>2</sub>                                                                                | 44.0                              | 0.0                     |
| CH <sub>4</sub>                                                                                | 16.0                              | 8.0                     |

**Supplementary Table 3.** Production rates of butyrate and caproate, in mg L<sup>-1</sup> d<sup>-1</sup>. Errors are standard errors.

| Experiment                                     | Condition             | Community A          |                   |                      |                   | Community B          |                   |                      |                   | Community C          |                   |                      |                   |
|------------------------------------------------|-----------------------|----------------------|-------------------|----------------------|-------------------|----------------------|-------------------|----------------------|-------------------|----------------------|-------------------|----------------------|-------------------|
|                                                |                       | Butyrate             |                   | Caproate             |                   | Butyrate             |                   | Caproate             |                   | Butyrate             |                   | Caproate             |                   |
|                                                |                       | H <sub>2</sub> -free | w/ H <sub>2</sub> | H <sub>2</sub> -free | w/ H <sub>2</sub> | H <sub>2</sub> -free | w/ H <sub>2</sub> | H <sub>2</sub> -free | w/ H <sub>2</sub> | H <sub>2</sub> -free | w/ H <sub>2</sub> | H <sub>2</sub> -free | w/ H <sub>2</sub> |
| Acidic pH values                               | pH 4.8                | 9.7 ± 0.5            | 11 ± 2            | 11 ± 1               | 9.5 ± 0.6         | -                    | -                 | -                    | -                 | 5.0 ± 0.2            | 13.5 ± 0.2        | 1.2 ± 0.8            | 5 ± 1             |
|                                                | pH 5.5                | 46 ± 3               | 57 ± 2            | 11 ± 2               | 12.8 ± 0.1        | -                    | -                 | -                    | -                 | 3 ± 2                | 1.1 ± 0.2         | 3.3 ± 0.9            | 4 ± 1             |
| Acetate concentration                          | Acetate 100 mM        | 0.2 ± 0.9            | 16 ± 5            | -0.8 ± 0.1           | -0.4 ± 0.1        | 1.0 ± 0.4            | 5 ± 2             | 5.6 ± 0.7            | 6.2 ± 0.4         | 1.9 ± 0.3            | 8 ± 2             | 0.1 ± 0.2            | 2 ± 1             |
|                                                | Acetate 200 mM        | 0 ± 1                | 12 ± 2            | -0.1 ± 0.4           | -0.4 ± 0.1        | 3.0 ± 0.1            | 12.0 ± 0.2        | 4.6 ± 0.1            | 5.8 ± 0.7         | 2.7 ± 0.2            | 14 ± 4            | 0.3 ± 0.4            | 3.9 ± 0.8         |
| Acidic/neutral pH or methanogenesis inhibition | pH 5.5 or uninhibited | 0.3 ± 0.2            | 19 ± 9            | 0.0 ± 0.0            | 0.0 ± 0.0         | 4.5 ± 0.0            | 23 ± 1            | 4.2 ± 0.1            | 25.7 ± 0.7        | 1.2 ± 0.4            | 12 ± 8            | 0.7 ± 0.3            | 4 ± 2             |
|                                                | pH 7.0 or inhibited   | 0.3 ± 0.1            | -0.5 ± 0.1        | 0.0 ± 0.0            | 0.0 ± 0.0         | 4.3 ± 0.2            | 32 ± 3            | 4 ± 1                | 14 ± 6            | 2 ± 1                | 30 ± 17           | 2 ± 1                | 10 ± 3            |
| Lactate and ethanol addition                   | pH 5.5 or uninhibited | 181 ± 8              | 317 ± 107         | 0.0 ± 0.0            | 8 ± 10            | 44.4 ± 0.7           | 49 ± 22           | 34 ± 1               | 86 ± 17           | 116.2 ± 0.6          | 190 ± 12          | 76.2 ± 0.4           | 72 ± 2            |
|                                                | pH 7.0 or inhibited   | 35                   | 172.9 ± 0.7       | 0                    | 0.0 ± 0.0         | 49 ± 8               | 32 ± 39           | 33 ± 4               | 61.0 ± 0.5        | 116.1 ± 0.3          | 167               | 43 ± 10              | 107               |

**Supplementary Table 4.** Taxonomy table with the 30 most abundant ASVs in the dataset with family and genus assigned according to the Silva 138 database. The closest cultured species is shown together with its BLAST similarity and the NCBI accession number. \*ASV\_0017 also has 100% similarity with an isolate from reactor A (Liu et al., 2020a; Liu et al., 2020b), i.e. Clostridiales bacterium isolate BL-6 (LR778135.1).

|           | Family                              | Genus                        | Most similar cultured species<br>(BLAST similarity, accession number) |
|-----------|-------------------------------------|------------------------------|-----------------------------------------------------------------------|
| ASV_0001  | Clostridiaceae                      | Clostridium sensu stricto 12 | <i>Clostridium tyrobutyricum</i> (100%, NR_044718.2)                  |
| ASV_0002  | Methanobacteriaceae                 | Methanobacterium             | <i>Methanobacterium congolense</i> (98.7%, NR_028175.1)               |
| ASV_0003  | Clostridiaceae                      | Clostridium sensu stricto 12 | <i>Clostridium luticellarii</i> (98.3%, NR_145907.1)                  |
| ASV_0004  | Methanobacteriaceae                 | Methanobacterium             | <i>Methanobacterium congolense</i> (98.2%, NR_028175.1)               |
| ASV_0005  | Clostridiaceae                      | Clostridium sensu stricto 12 | <i>Clostridium luticellarii</i> (99.0%, NR_145907.1)                  |
| ASV_0006  | Anaerovoracaceae                    | -                            | <i>Eubacterium pyruvativorans</i> (92.0%, NR_042074.1)                |
| ASV_0007  | Anaerovoracaceae                    | -                            | <i>Eubacterium pyruvativorans</i> (91.8%, NR_042074.1)                |
| ASV_0008  | Anaerovoracaceae                    | -                            | <i>Eubacterium pyruvativorans</i> (92.1%, NR_042074.1)                |
| ASV_0009  | Clostridiaceae                      | Clostridium sensu stricto 12 | <i>Clostridium luticellarii</i> (99.8%, NR_145907.1)                  |
| ASV_0010  | Ruminococcaceae                     | Caproiciproducens            | <i>Caprobacter fermentans</i> (95.0%, MN851263.1)                     |
| ASV_0011  | Methanobacteriaceae                 | Methanobrevibacter           | <i>Methanobrevibacter boviskoreani</i> (100%, NR_118565.1)            |
| ASV_0012  | Atopobiaceae                        | Olsenella                    | <i>Olsenella scatoligenes</i> (100%, NR_134781.1)                     |
| ASV_0016  | Lactobacillaceae                    | Lactobacillus                | <i>Lactobacillus mucosae</i> (100%, MT613566.1)                       |
| ASV_0017* | Ruminococcaceae                     | Caproiciproducens            | <i>[Clostridium] sporosphaeroides</i> (96.8%, NR_044835.2)            |
| ASV_0018  | Peptostreptococcales-Tissierellales | -                            | <i>Soehngenia saccharolytica</i> (92.8%, NR_117382.1)                 |
| ASV_0020  | Oscillospiraceae                    | Oscillibacter                | <i>Oscillibacter ruminantium</i> (92.1%, NR_118156.1)                 |
| ASV_0021  | Clostridiaceae                      | Clostridium sensu stricto 12 | <i>Clostridium luticellarii</i> (97.8%, NR_145907.1)                  |
| ASV_0022  | Limnochordia class                  | -                            | <i>Natranaerobaculum magadiense</i> (88.8%, NR_135713.1)              |
| ASV_0029  | Ruminococcaceae                     | Caproiciproducens            | <i>Caprobacter fermentans</i> (95.0%, MN851263.1)                     |
| ASV_0033  | Veillonellaceae                     | Megasphaera                  | <i>Megasphaera hexanoica</i> (100%, NR_157635.1)                      |
| ASV_0035  | Actinomycetaceae                    | Actinomyces                  | <i>Actinomyces polynesiensis</i> (100%, NR_144691.1)                  |
| ASV_0036  | Lactobacillaceae                    | Lactobacillus                | <i>Lactobacillus mucosae</i> (100%, MT539050.1)                       |
| ASV_0038  | Erysipelotrichaceae                 | Solobacterium                | <i>Anaerorhabdus furcosa</i> (90.8%, NR_117779.1)                     |
| ASV_0039  | Acidaminococcaceae                  | Acidaminococcus              | <i>Acidaminococcus fermentans</i> (96.3%, NR_037018.1)                |
| ASV_0042  | Lachnospiraceae                     | Syntrophococcus              | <i>[Eubacterium] cellulosolvens</i> (95.2%, NR_026106.1)              |
| ASV_0043  | Limnochordia class                  | -                            | <i>Sporanaerobacter acetigenes</i> (87.8%, NR_117381.1)               |
| ASV_0048  | Veillonellaceae                     | Megasphaera                  | <i>Megasphaera elsdenii</i> (99.8%, NR_113306.1)                      |
| ASV_0051  | Peptostreptococcales-Tissierellales | -                            | <i>Soehngenia saccharolytica</i> (93.0%, NR_117382.1)                 |
| ASV_0054  | Propionibacteriaceae                | Cutibacterium                | <i>Cutibacterium avidum</i> (99.5%, NR_118647.1)                      |
| ASV_0073  | Coriobacteriales Incertae Sedis     | -                            | <i>Gordonibacter pamelaee</i> (91.1%, MK544834.1)                     |

## 1.2 Supplementary Figures

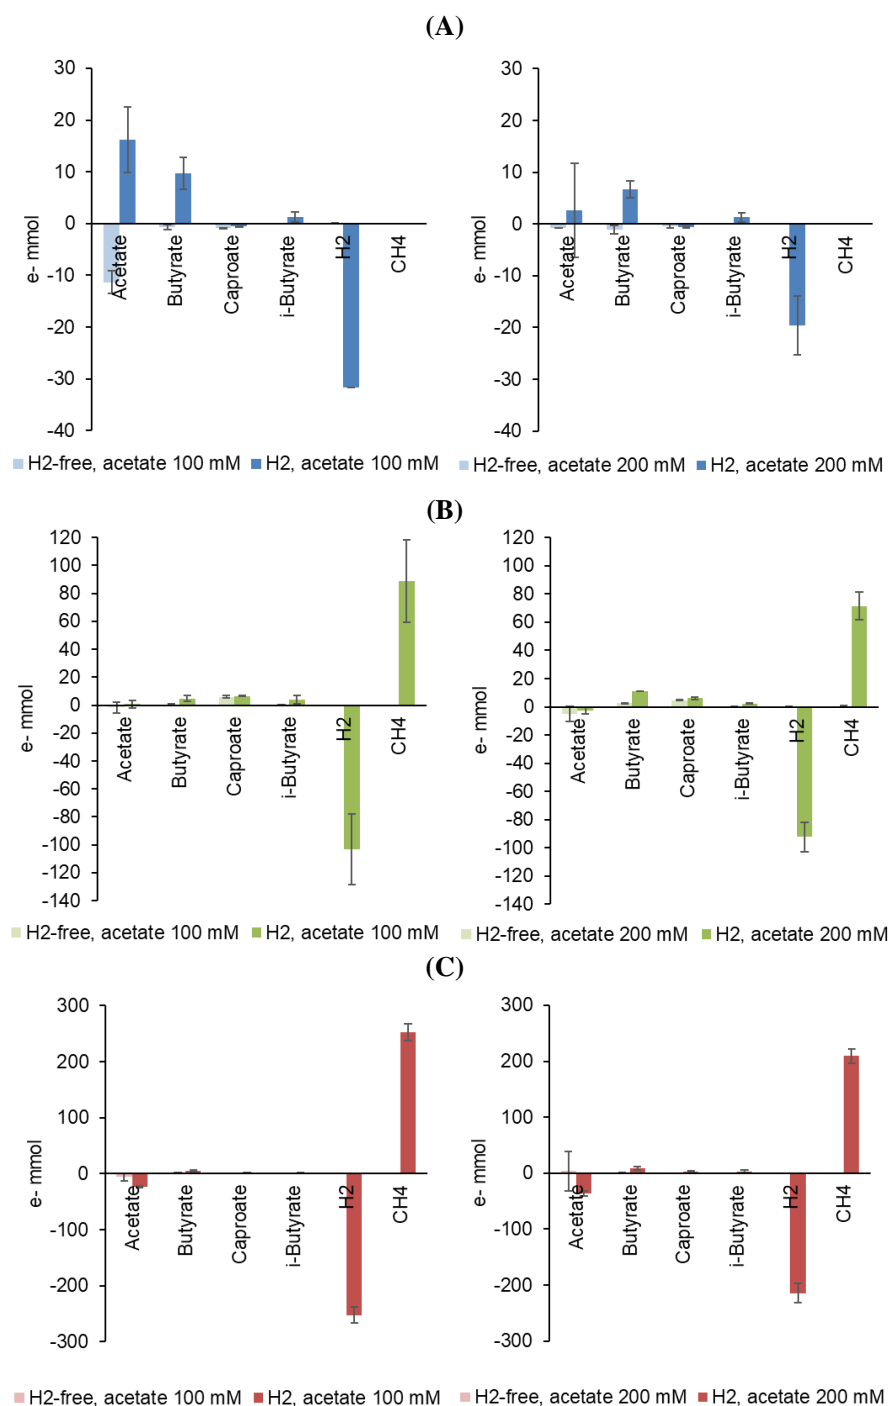

**Supplementary Figure 1.** Electron balances for the acetate concentration experiment with communities A (A), B (B), and C (C) in equivalent mmols of electrons. Biomass, lactate, propionate, and valerate are not shown due to negligible variations for these components. Error bars are standard error.

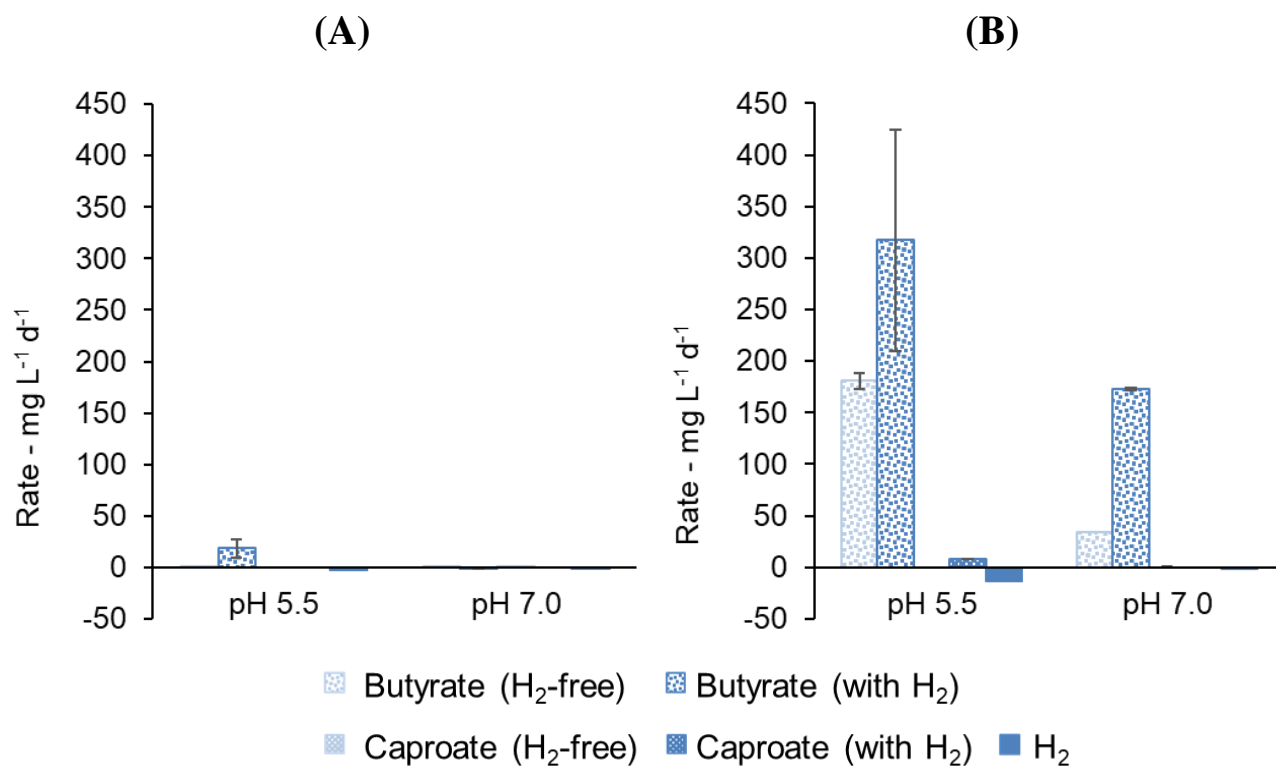

**Supplementary Figure 2.** Effects of pH and H<sub>2</sub> before (A) and after (B) ethanol and lactate addition on rates of caproate, butyrate, and H<sub>2</sub> by community A. One of the duplicates of community A without H<sub>2</sub> at pH 7.0 in (B) was lost and no standard error bar is shown for this condition. Error bars are standard errors.

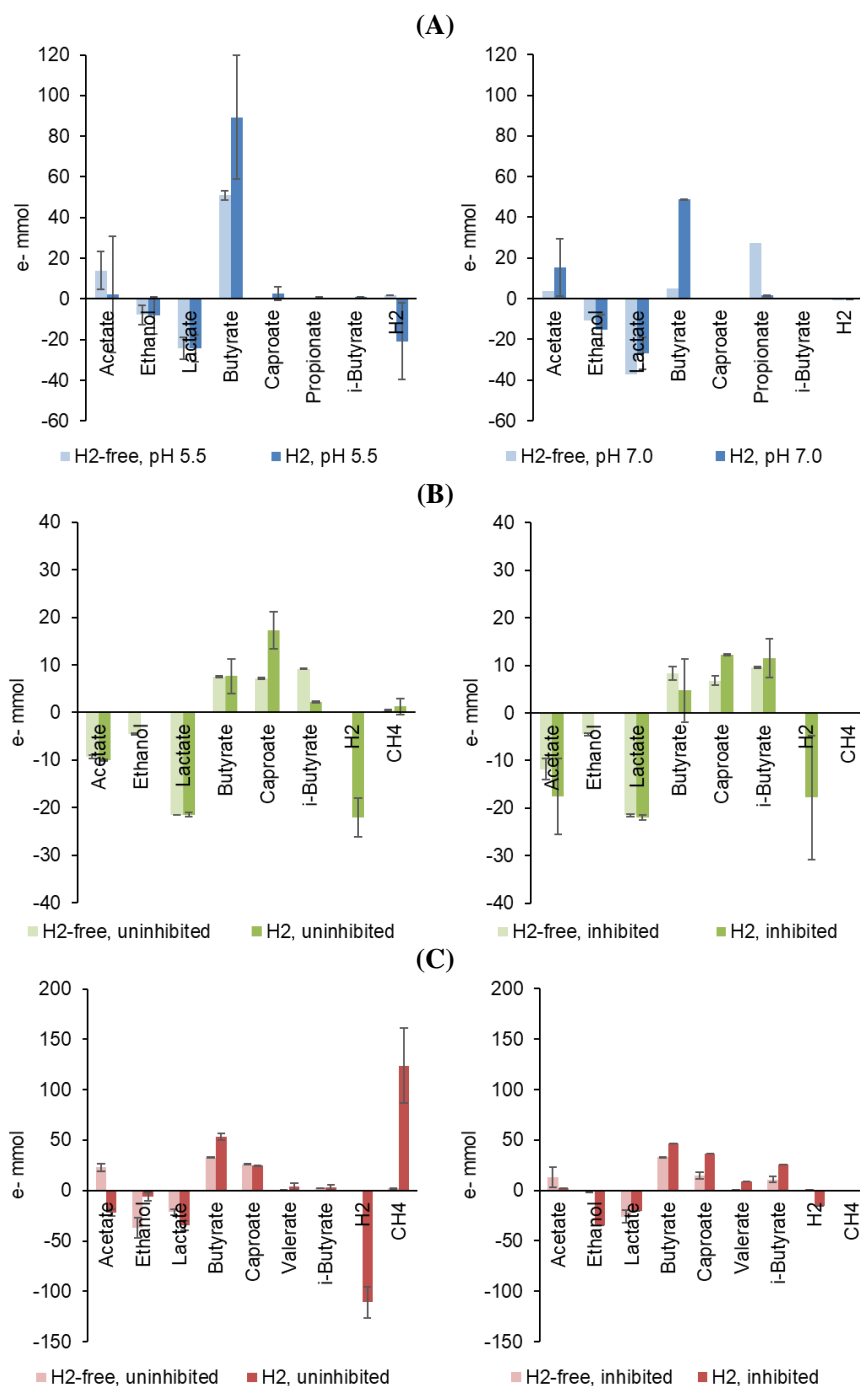

**Supplementary Figure 3.** Electron balances for the lactate and ethanol addition experiment for communities A (A), B (B), and C (C) in equivalent mmols of electrons. Components that had negligible variation throughout the experiment are omitted. Error bars are standard error.

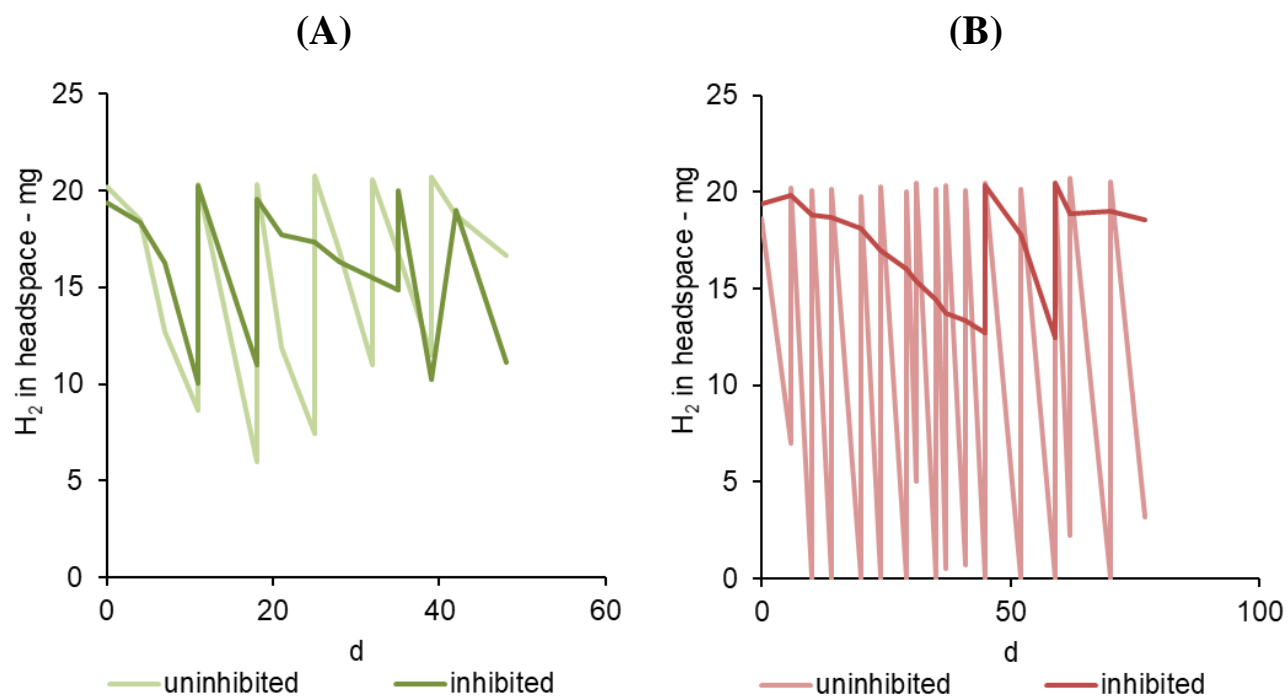

**Supplementary Figure 4.** Amount of  $H_2$  in the headspace for communities B (A) and C (B) in the methanogenesis inhibition experiment. In community B neither inhibited nor uninhibited bottles had complete  $H_2$  depletion. On the other hand, uninhibited culture bottles with community C faced  $H_2$  depletion often.

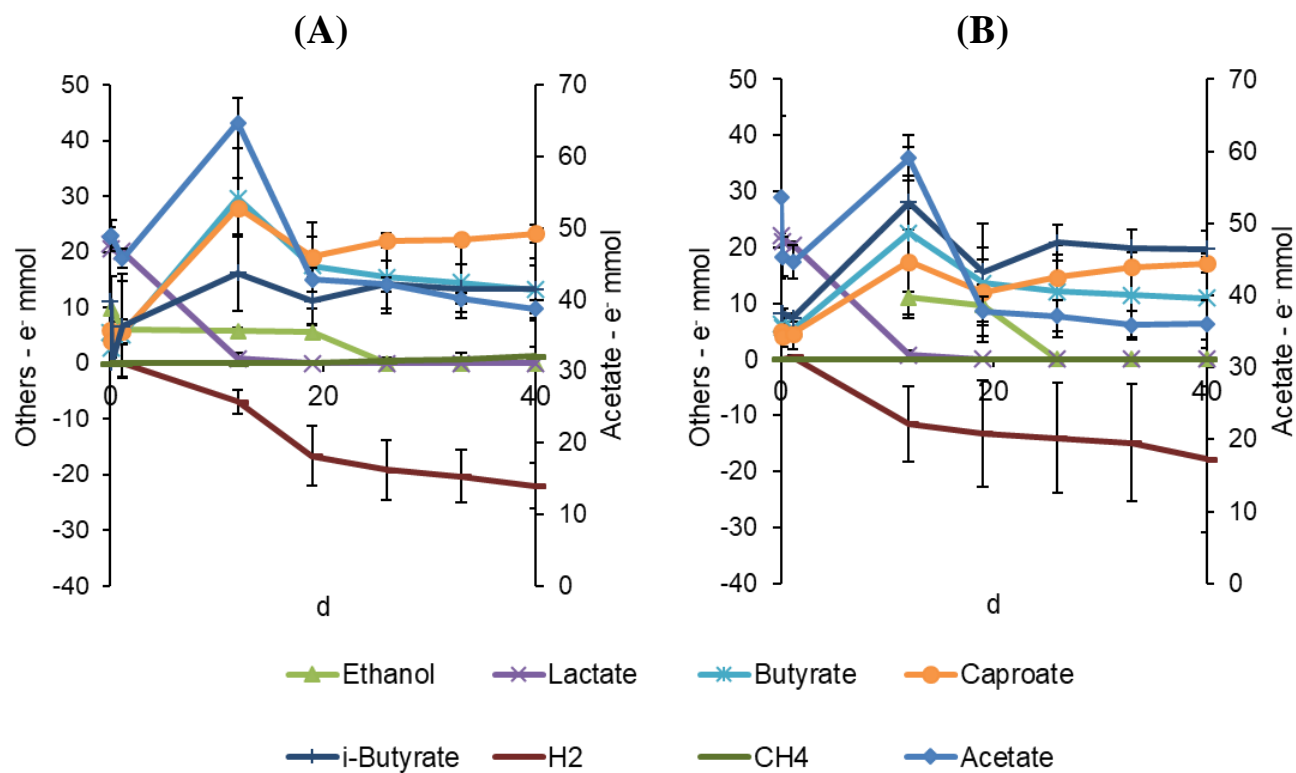

**Supplementary Figure 5.** Kinetics profiles for community B after lactate and ethanol addition to the bottles without (A) and with (B) methanogenesis inhibitor. Error bars are standard error.



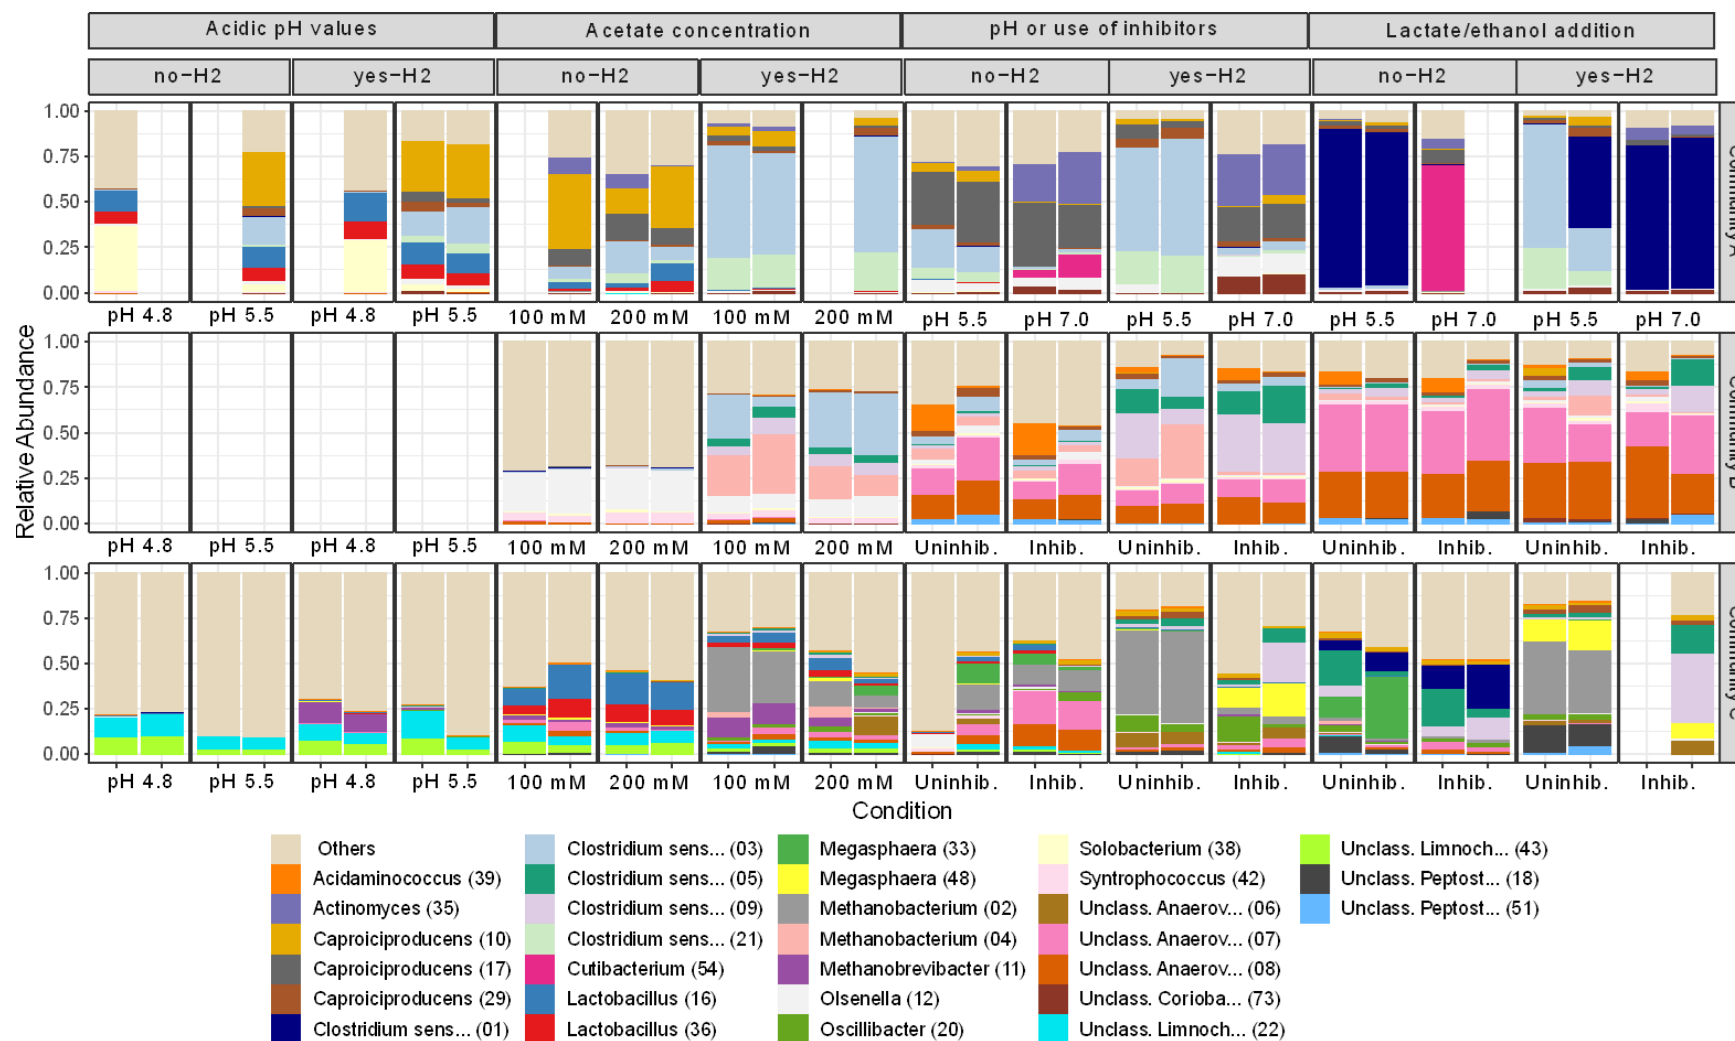

**Supplementary Figure 6.** Community profiles at each condition tested in the study resolved to the ASV level for the 30 most abundant ASVs in the dataset (ASV number in parenthesis). Duplicates are shown. Slots left blank represent samples that could not be sequenced.

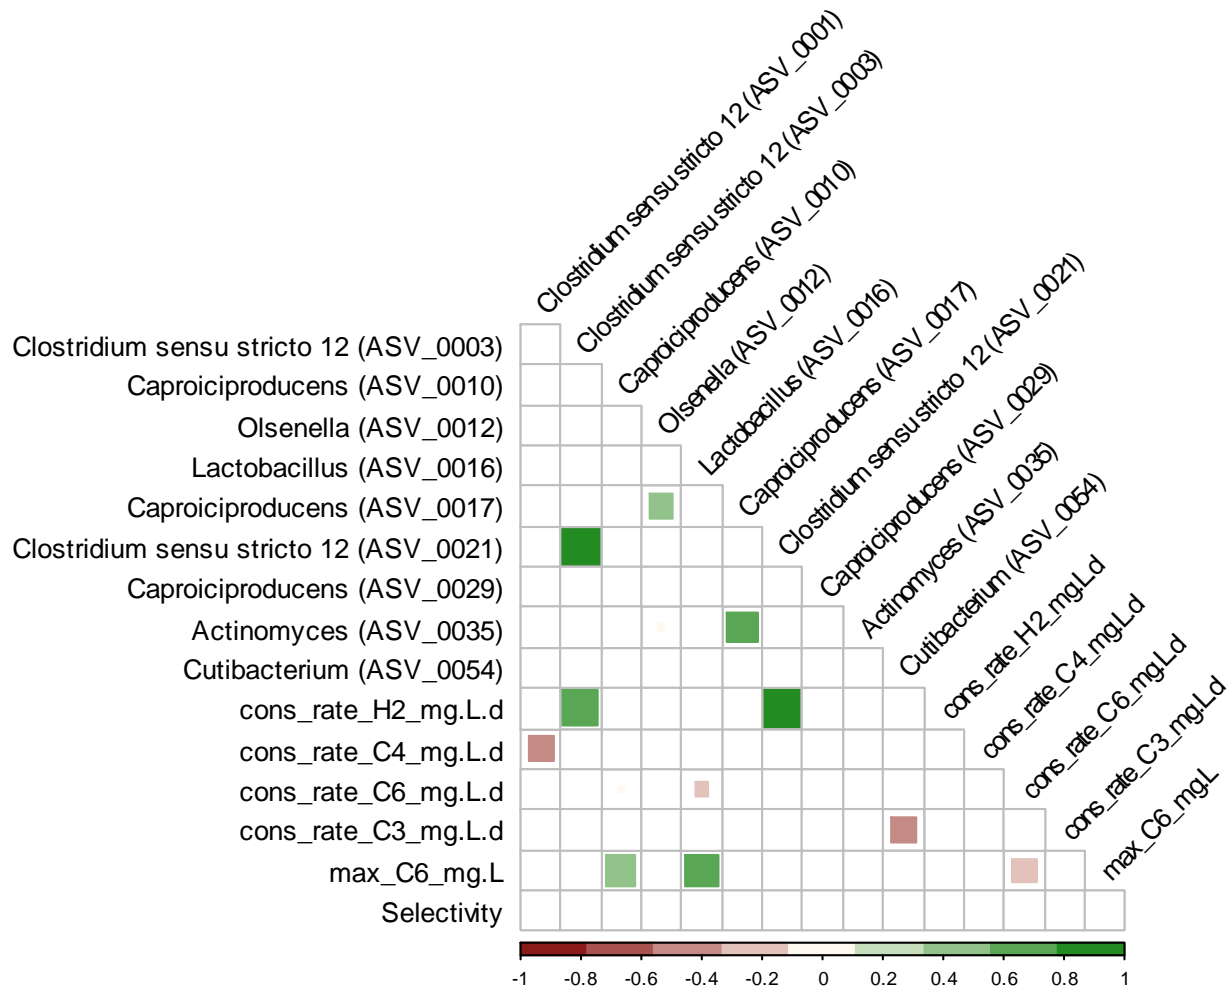

**Supplementary Figure 7.** Spearman correlations ( $p < 0.01$ ) between the 10 most abundant ASVs of community A and abiotic parameters (rates of  $H_2$ , butyrate, caproate, and propionate, as well as maximum caproate concentration, and selectivity of EDs to caproate). As a convention, all rates are presented as consumption rates. Thus, a negative correlation to caproate consumption rate is equivalent to a positive correlation to caproate formation rate and vice-versa.

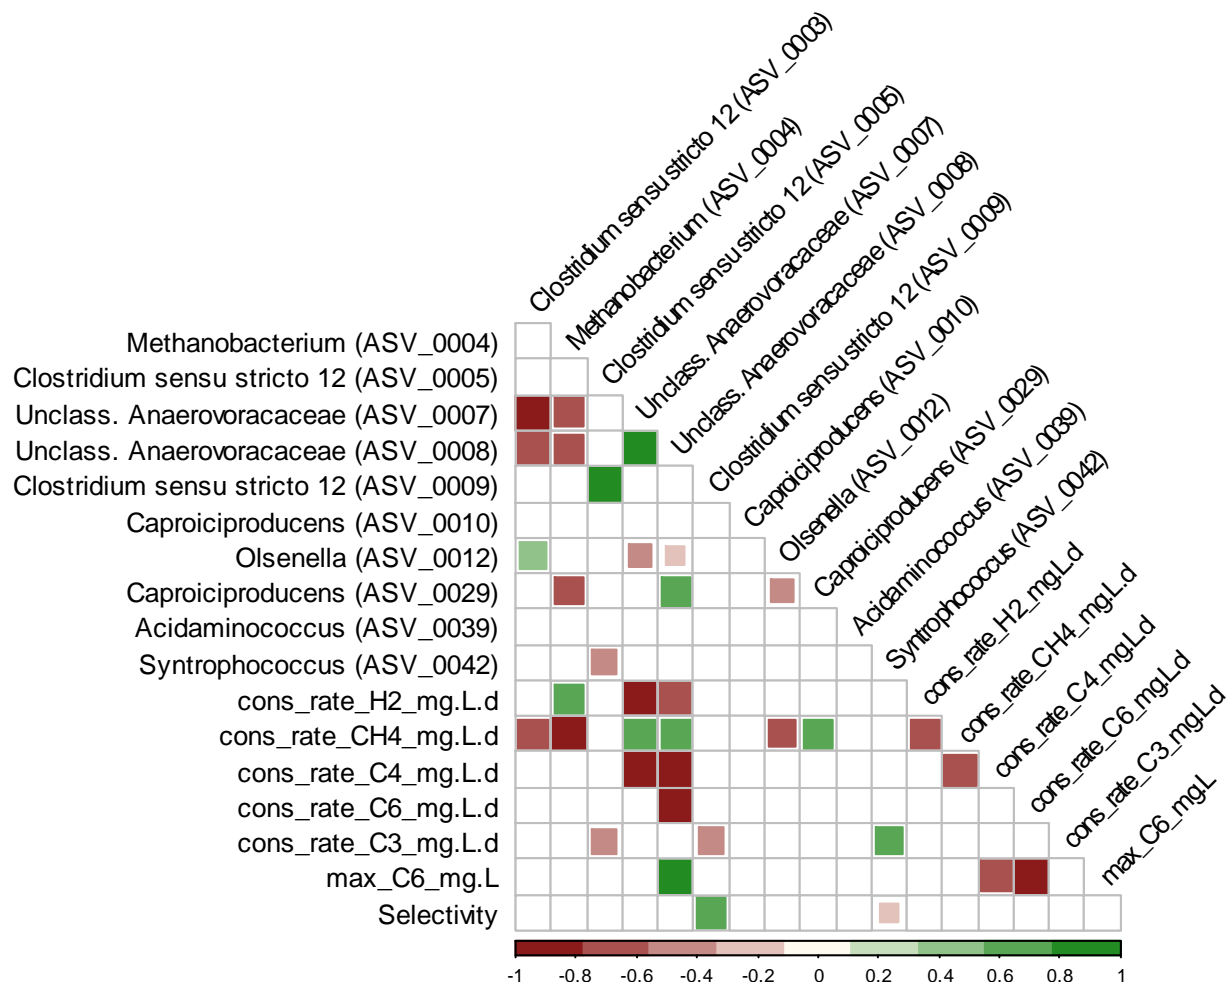

**Supplementary Figure 8.** Spearman correlations ( $p < 0.01$ ) between the 10 most abundant ASVs of community B, ASV 10, and abiotic parameters (rates of H<sub>2</sub>, CH<sub>4</sub>, butyrate, caproate, and propionate, as well as maximum caproate concentration, and selectivity of EDs to caproate). As a convention, all rates are presented as consumption rates. Thus, a negative correlation to caproate consumption rate is equivalent to a positive correlation to caproate formation rate.

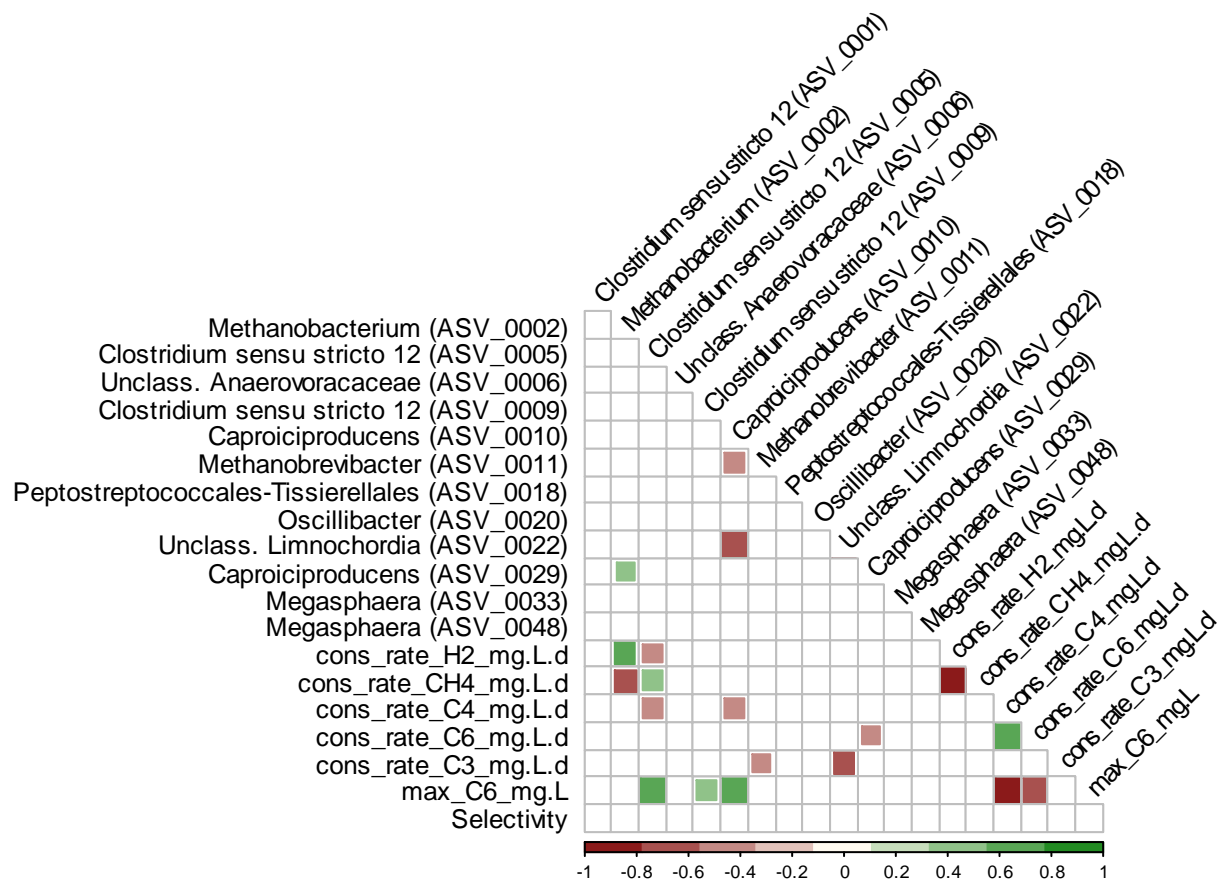

**Supplementary Figure 9.** Spearman correlations ( $p < 0.01$ ) between the 10 most abundant ASVs of community C, ASV 6, ASV 10, ASV 29 and abiotic parameters (rates of  $H_2$ ,  $CH_4$ , butyrate, caproate, and propionate, as well as maximum caproate concentration, and selectivity of EDs to caproate). As a convention, all rates are presented as consumption rates. Thus, a negative correlation to caproate consumption rate is equivalent to a positive correlation to caproate formation rate.

## 2 References

- Liu, B., Popp, D., Muller, N., Strauber, H., Harms, H., and Kleinstaub, S. (2020a). Three Novel Clostridia Isolates Produce n-Caproate and iso-Butyrate from Lactate: Comparative Genomics of Chain-Elongating Bacteria. *Microorganisms* 8(12). doi: 10.3390/microorganisms8121970.
- Liu, B., Popp, D., Strauber, H., Harms, H., and Kleinstaub, S. (2020b). Draft Genome Sequences of Three Clostridia Isolates Involved in Lactate-Based Chain Elongation. *Microbiol Resour Announc* 9(32). doi: 10.1128/MRA.00679-20.
